# Supplementary material for: Prediction of Cardiovascular Events by Pulse Waveform Parameters: Analysis of CARTaGENE
Source: PubMed Central journal article supplement — J Am Heart Assoc. 2022 Sep 3;11(17):e026603. doi: 10.1161/JAHA.122.026603 (PMC9496446; doi:10.1161/jaha.122.026603), 2022-09-03
Supplement: JAH3-11-e026603-s001.pdf [file JAH3-11-e026603-s001.pdf]

# **SUPPLEMENTAL MATERIAL**

**TABLE S1. Independent association of waveform parameters with MACEs – Sensitivity analyses**

| <b>Parameter</b> | <b>Main analysis</b> | <b>Adjustment for DBP</b> | <b>Without HR &lt; 60 (n= 14,897)</b> | <b>Without prior cardiovascular disease (n= 15,113)</b> | <b>With reduced spline use for confounder adjustment</b> |
|------------------|----------------------|---------------------------|---------------------------------------|---------------------------------------------------------|----------------------------------------------------------|
| <b>cPP</b>       | 1.17 (1.08, 1.26)    | 1.13 (1.08, 1.18)         | 1.15 (1.05, 1.25)                     | 1.15 (1.05, 1.27)                                       | 1.17 (1.09, 1.26)                                        |
| <b>AIx@75</b>    | 1.05 (1.00, 1.11)    | 1.07 (1.01, 1.12)         | 1.08 (1.02, 1.14)                     | 1.05 (0.99, 1.12)                                       | 1.05 (1.00, 1.11)                                        |
| <b>Pf</b>        | 1.12 (1.04, 1.20)    | 1.11 (1.06, 1.15)         | 1.11 (1.03, 1.20)                     | 1.12 (1.02, 1.22)                                       | 1.13 (1.05, 1.21)                                        |
| <b>Pb</b>        | 1.11 (1.03, 1.19)    | 1.12 (1.06, 1.17)         | 1.11 (1.02, 1.20)                     | 1.12 (1.03, 1.23)                                       | 1.11 (1.04, 1.19)                                        |
| <b>RM</b>        | 1.03 (0.97, 1.08)    | 1.03 (0.98, 1.09)         | 1.03 (0.97, 1.09)                     | 1.03 (0.97, 1.10)                                       | 1.03 (0.97, 1.08)                                        |

Associations are presented as *hazard ratios (95% confidence interval)* for one standard deviation increase from the fully adjusted model (age, sex, race, height, weight, smoking, diabetes, total cholesterol, high-density-lipoprotein levels, estimated glomerular filtration rate, heart rate, statin use, prior cardiovascular disease, antihypertensive drug use and systolic blood pressure).

Adjustment for DBP was conducted by replacing SBP by DBP.

Reduced spline use was conducted by only using splines for confounders with a significant or near significant ( $p < 0.10$ ) non-linear term in any of the multiply imputed datasets.

AIx@75, Augmentation index at 75 beats per minute; cPP, Central pulse pressure; DBP, Diastolic blood pressure; HR, Hazard ratio; MACE, Major adverse cardiovascular event; Pb, Backward pressure; Pf, Forward pressure; PWA, Pulse wave analysis; RM, Reflection magnitude; SBP, Systolic blood pressure; WSA, Wave separation analysis.

**TABLE S2. Predictive value of waveform parameters for MACEs – Sensitivity analysis with ASCVD probabilities treated non-linearly as splines**

| Parameters            | ASCVD-adjusted    |         | $\Delta$ C-index (%) | Continuous NRI | IDI (%) |
|-----------------------|-------------------|---------|----------------------|----------------|---------|
|                       | HR (95% CI)       | LR Test |                      |                |         |
| <b>PWA parameters</b> |                   |         |                      |                |         |
| cPP                   | 1.06 (1.02, 1.10) | 0.005   | 0.03                 | 0.060          | 0.08    |
| AIx@75                | 1.10 (1.05, 1.15) | < 0.001 | 0.18                 | 0.069          | 0.10    |
| <b>WSA parameters</b> |                   |         |                      |                |         |
| Pf                    | 1.03 (0.99, 1.08) | 0.113   | -0.01                | 0.029          | 0.04    |
| Pb                    | 1.06 (1.02, 1.10) | 0.002   | 0.05                 | 0.059          | 0.08    |
| RM                    | 1.08 (1.03, 1.12) | < 0.001 | 0.13                 | 0.057          | 0.07    |

Hazard ratios are presented for one standard deviation increase. Likelihood ratio tests are presented as the maximal p-value observed across the ten multiply imputed datasets.

AIx@75, Augmentation index at 75 beats per minute; CI, Confidence interval; cPP, Central pulse pressure; HR, Hazard ratio; MACE, Major adverse cardiovascular event; Pb, Backward pressure; Pf, Forward pressure; PWA, Pulse wave analysis; RM, Reflection magnitude; WSA, Wave separation analysis.

**TABLE S3. Interaction between waveform parameters and baseline ASCVD risk**

| <b>Parameter</b> | <b>p-value</b>       | <b>ASCVD = 2.5%</b>            | <b>ASCVD = 7.5%</b>            | <b>ASCVD = 15%</b>             | <b>ASCVD = 25%</b>             |
|------------------|----------------------|--------------------------------|--------------------------------|--------------------------------|--------------------------------|
| <b>cPP</b>       | 0.066                | 1.01 (0.94, 1.08)              | 1.05 (1.00, 1.09) <sup>#</sup> | 1.07 (1.03, 1.12) <sup>#</sup> | 1.09 (1.04, 1.15) <sup>#</sup> |
| <b>AIx@75</b>    | 0.024 <sup>#</sup>   | 1.16 (1.09, 1.23) <sup>#</sup> | 1.10 (1.05, 1.14) <sup>#</sup> | 1.06 (1.00, 1.11)              | 1.03 (0.95, 1.11)              |
| <b>Pf</b>        | < 0.001 <sup>#</sup> | 0.94 (0.88, 1.01)              | 1.01 (0.96, 1.05)              | 1.05 (1.01, 1.10) <sup>#</sup> | 1.09 (1.04, 1.14) <sup>#</sup> |
| <b>Pb</b>        | 0.355                | 1.04 (0.97, 1.11)              | 1.06 (1.02, 1.10) <sup>#</sup> | 1.07 (1.03, 1.12) <sup>#</sup> | 1.08 (1.03, 1.14) <sup>#</sup> |
| <b>RM</b>        | 0.003 <sup>#</sup>   | 1.16 (1.09, 1.24) <sup>#</sup> | 1.08 (1.04, 1.13) <sup>#</sup> | 1.03 (0.98, 1.09)              | 1.00 (0.93, 1.06)              |

Associations are presented as *hazard ratios (95% confidence interval)* for one standard deviation increase after adjustment for the ASCVD score. *P-values* were generated using the interaction term between baseline ASCVD risk and each parameter.

# Indicates a *p-value* < 0.05 after correction with the Benjamini-Hochberg procedure

AIx@75, Augmentation index at 75 beats per minute; ASCVD, Atherosclerotic cardiovascular disease; cPP, Central pulse pressure; Pb, Backward pressure; Pf, Forward pressure; PWA, Pulse wave analysis; RM, Reflection magnitude; WSA, Wave separation analysis.

**TABLE S4. Predictive value of waveform parameters for MACEs in each ASCVD risk strata**

| Parameter             | Global            | Low risk<br>< 5%<br>(n=9,374)  | Intermediate risk<br>5-20%<br>(n=7,087) | High risk<br>≥ 20%<br>(n=1,100) |
|-----------------------|-------------------|--------------------------------|-----------------------------------------|---------------------------------|
| <b>Hazard ratio</b>   |                   |                                |                                         |                                 |
| cPP                   | 1.06 (1.02, 1.08) | 1.05 (0.96, 1.16)              | 1.04 (0.99, 1.10)                       | 1.08 (1.00, 1.17)               |
| AIx@75                | 1.10 (1.06, 1.15) | 1.15 (1.07, 1.24) <sup>#</sup> | 1.08 (1.02, 1.14)                       | 1.03 (0.91, 1.17)               |
| Pf                    | 1.04 (1.00, 1.08) | 0.96 (0.86, 1.06)              | 1.03 (0.97, 1.09)                       | 1.09 (1.01, 1.18)               |
| Pb                    | 1.07 (1.03, 1.11) | 1.08 (0.99, 1.19)              | 1.05 (1.00, 1.10)                       | 1.07 (0.99, 1.15)               |
| RM                    | 1.08 (1.03, 1.12) | 1.15 (1.06, 1.24) <sup>#</sup> | 1.06 (1.00, 1.12)                       | 1.01 (0.91, 1.12)               |
| <b>Δ C-index (%)</b>  |                   |                                |                                         |                                 |
| cPP                   | 0.03              | 0.00                           | 0.09                                    | 0.57                            |
| AIx@75                | 0.19              | 1.12                           | 0.34                                    | 0.26                            |
| Pf                    | -0.08             | 0.04                           | 0.02                                    | 0.52                            |
| Pb                    | 0.05              | 0.13                           | 0.12                                    | 0.58                            |
| RM                    | 0.12              | 0.85                           | 0.22                                    | 0.05                            |
| <b>Continuous NRI</b> |                   |                                |                                         |                                 |
| cPP                   | 0.006             | 0.047                          | 0.076                                   | 0.061                           |
| AIx@75                | 0.066             | 0.155                          | 0.063                                   | 0.006                           |
| Pf                    | -0.029            | -0.005                         | 0.030                                   | 0.106                           |
| Pb                    | 0.016             | 0.037                          | 0.079                                   | 0.057                           |
| RM                    | 0.053             | 0.095                          | 0.047                                   | 0.010                           |
| <b>IDI (%)</b>        |                   |                                |                                         |                                 |
| cPP                   | 0.10              | 0.01                           | 0.04                                    | 0.43                            |
| AIx@75                | 0.11              | 0.17                           | 0.07                                    | 0.02                            |
| Pf                    | 0.05              | 0.01                           | 0.02                                    | 0.45                            |
| Pb                    | 0.10              | 0.04                           | 0.05                                    | 0.32                            |
| RM                    | 0.07              | 0.14                           | 0.06                                    | 0.00                            |

<sup>#</sup> Indicates a likelihood ratio *p*-value < 0.05 after correction with the Benjamini-Hochberg procedure

AIx@75, Augmentation index at 75 beats per minute; ASCVD, Atherosclerotic cardiovascular disease; cPP, Central pulse pressure; Pb, Backward pressure; Pf, Forward pressure; PWA, Pulse wave analysis; Rm, Reflection magnitude; WSA, Wave separation analysis.

**TABLE S5. Reclassification tables with and without cPP at the tenth-year follow-up**

**A. All individuals**

|                    |                          | <b>With cPP</b> |                          |                  |
|--------------------|--------------------------|-----------------|--------------------------|------------------|
| <b>Without cPP</b> |                          | <i>Low risk</i> | <i>Intermediate risk</i> | <i>High risk</i> |
|                    | <i>Low risk</i>          | 9,217           | 151                      | 0                |
|                    | <i>Intermediate risk</i> | 259             | 6,708                    | 125              |
|                    | <i>High risk</i>         | 0               | 112                      | 989              |

**B. Individuals with MACEs**

|                    |                          | <b>With cPP</b> |                          |                  |
|--------------------|--------------------------|-----------------|--------------------------|------------------|
| <b>Without cPP</b> |                          | <i>Low risk</i> | <i>Intermediate risk</i> | <i>High risk</i> |
|                    | <i>Low risk</i>          | 643             | 24                       | 0                |
|                    | <i>Intermediate risk</i> | 33              | 1,168                    | 37               |
|                    | <i>High risk</i>         | 0               | 29                       | 330              |

**C. Individuals without MACEs**

|                    |                          | <b>With cPP</b> |                          |                  |
|--------------------|--------------------------|-----------------|--------------------------|------------------|
| <b>Without cPP</b> |                          | <i>Low risk</i> | <i>Intermediate risk</i> | <i>High risk</i> |
|                    | <i>Low risk</i>          | 6,158           | 94                       | 0                |
|                    | <i>Intermediate risk</i> | 176             | 4,130                    | 65               |
|                    | <i>High risk</i>         | 0               | 59                       | 493              |

**TABLE S6. Reclassification tables with and without AIx@75 at the tenth-year follow-up**

**A. All individuals**

|                       |                          | <b>With AIx@75</b> |                          |                  |
|-----------------------|--------------------------|--------------------|--------------------------|------------------|
|                       |                          | <i>Low risk</i>    | <i>Intermediate risk</i> | <i>High risk</i> |
| <b>Without AIx@75</b> | <i>Low risk</i>          | 9,068              | 300                      | 0                |
|                       | <i>Intermediate risk</i> | 422                | 6,514                    | 156              |
|                       | <i>High risk</i>         | 0                  | 123                      | 978              |

**B. Individuals with MACEs**

|                       |                          | <b>With AIx@75</b> |                          |                  |
|-----------------------|--------------------------|--------------------|--------------------------|------------------|
|                       |                          | <i>Low risk</i>    | <i>Intermediate risk</i> | <i>High risk</i> |
| <b>Without AIx@75</b> | <i>Low risk</i>          | 633                | 34                       | 0                |
|                       | <i>Intermediate risk</i> | 43                 | 1,156                    | 39               |
|                       | <i>High risk</i>         | 0                  | 33                       | 326              |

**C. Individuals without MACEs**

|                       |                          | <b>With AIx@75</b> |                          |                  |
|-----------------------|--------------------------|--------------------|--------------------------|------------------|
|                       |                          | <i>Low risk</i>    | <i>Intermediate risk</i> | <i>High risk</i> |
| <b>Without AIx@75</b> | <i>Low risk</i>          | 6,053              | 199                      | 0                |
|                       | <i>Intermediate risk</i> | 287                | 3,998                    | 86               |
|                       | <i>High risk</i>         | 0                  | 61                       | 491              |

**TABLE S7. Reclassification tables with and without Pf at the tenth-year follow-up**

**A. All individuals**

|                   |                          | <b>With Pf</b>  |                          |                  |
|-------------------|--------------------------|-----------------|--------------------------|------------------|
| <b>Without Pf</b> |                          | <i>Low risk</i> | <i>Intermediate risk</i> | <i>High risk</i> |
|                   | <i>Low risk</i>          | 9,268           | 100                      | 0                |
|                   | <i>Intermediate risk</i> | 150             | 6,860                    | 82               |
|                   | <i>High risk</i>         | 0               | 63                       | 1,038            |

**B. Individuals with MACEs**

|                   |                          | <b>With Pf</b>  |                          |                  |
|-------------------|--------------------------|-----------------|--------------------------|------------------|
| <b>Without Pf</b> |                          | <i>Low risk</i> | <i>Intermediate risk</i> | <i>High risk</i> |
|                   | <i>Low risk</i>          | 650             | 17                       | 0                |
|                   | <i>Intermediate risk</i> | 22              | 1,193                    | 23               |
|                   | <i>High risk</i>         | 0               | 15                       | 344              |

**C. Individuals without MACEs**

|                   |                          | <b>With Pf</b>  |                          |                  |
|-------------------|--------------------------|-----------------|--------------------------|------------------|
| <b>Without Pf</b> |                          | <i>Low risk</i> | <i>Intermediate risk</i> | <i>High risk</i> |
|                   | <i>Low risk</i>          | 6,194           | 58                       | 0                |
|                   | <i>Intermediate risk</i> | 95              | 4,232                    | 44               |
|                   | <i>High risk</i>         | 0               | 29                       | 523              |



**TABLE S8. Reclassification tables with and without Pb at the tenth-year follow-up**

**A. All individuals**

|                   |                          | <b>With Pb</b>  |                          |                  |
|-------------------|--------------------------|-----------------|--------------------------|------------------|
| <b>Without Pb</b> |                          | <i>Low risk</i> | <i>Intermediate risk</i> | <i>High risk</i> |
|                   | <i>Low risk</i>          | 9,201           | 167                      | 0                |
|                   | <i>Intermediate risk</i> | 271             | 6,686                    | 135              |
|                   | <i>High risk</i>         | 0               | 112                      | 989              |

**B. Individuals with MACEs**

|                   |                          | <b>With Pb</b>  |                          |                  |
|-------------------|--------------------------|-----------------|--------------------------|------------------|
| <b>Without Pb</b> |                          | <i>Low risk</i> | <i>Intermediate risk</i> | <i>High risk</i> |
|                   | <i>Low risk</i>          | 642             | 25                       | 0                |
|                   | <i>Intermediate risk</i> | 35              | 1,164                    | 39               |
|                   | <i>High risk</i>         | 0               | 31                       | 328              |

**C. Individuals without MACEs**

|                   |                          | <b>With Pb</b>  |                          |                  |
|-------------------|--------------------------|-----------------|--------------------------|------------------|
| <b>Without Pb</b> |                          | <i>Low risk</i> | <i>Intermediate risk</i> | <i>High risk</i> |
|                   | <i>Low risk</i>          | 6,149           | 103                      | 0                |
|                   | <i>Intermediate risk</i> | 183             | 4,115                    | 73               |
|                   | <i>High risk</i>         | 0               | 58                       | 494              |

**TABLE S9. Reclassification tables with and without RM at the tenth-year follow-up**

**A. All individuals**

|                   |                          | <b>With RM</b>  |                          |                  |
|-------------------|--------------------------|-----------------|--------------------------|------------------|
| <b>Without RM</b> |                          | <i>Low risk</i> | <i>Intermediate risk</i> | <i>High risk</i> |
|                   | <i>Low risk</i>          | 9,145           | 223                      | 0                |
|                   | <i>Intermediate risk</i> | 294             | 6,661                    | 137              |
|                   | <i>High risk</i>         | 0               | 116                      | 985              |

**B. Individuals with MACEs**

|                   |                          | <b>With RM</b>  |                          |                  |
|-------------------|--------------------------|-----------------|--------------------------|------------------|
| <b>Without RM</b> |                          | <i>Low risk</i> | <i>Intermediate risk</i> | <i>High risk</i> |
|                   | <i>Low risk</i>          | 644             | 23                       | 0                |
|                   | <i>Intermediate risk</i> | 34              | 1,169                    | 35               |
|                   | <i>High risk</i>         | 0               | 36                       | 323              |

**C. Individuals without MACEs**

|                   |                          | <b>With RM</b>  |                          |                  |
|-------------------|--------------------------|-----------------|--------------------------|------------------|
| <b>Without RM</b> |                          | <i>Low risk</i> | <i>Intermediate risk</i> | <i>High risk</i> |
|                   | <i>Low risk</i>          | 6,100           | 152                      | 0                |
|                   | <i>Intermediate risk</i> | 199             | 4,094                    | 78               |
|                   | <i>High risk</i>         | 0               | 59                       | 493              |
